# Supplementary material for: Associations of Sleep Disturbance Symptoms With Health-Related Quality of Life in Parkinson’s Disease
Source: Atypon-hosted journal article supplement (doi:10.1176/appi.neuropsych.12070175), 2013-10-01
Supplement: 319_ds001.pdf [file 319_ds001.pdf]

## Appendix: Medical Outcomes Study (MOS) Sleep measure

### MOS Sleep measure (11 of 12 items)

#### Sleep disturbance Initiation (2-items)

|                                                                              | 0-15 mins       | 16-30 mins       | 31-45 mins             | 46-60 mins       | More than 60 mins    |                  |
|------------------------------------------------------------------------------|-----------------|------------------|------------------------|------------------|----------------------|------------------|
| How long did it usually take for you to fall asleep during the past 4 weeks? | 1               | 2                | 3                      | 4                | 5                    |                  |
|                                                                              | All of the time | Most of the time | A good bit of the time | Some of the time | A little of the time | None of the time |
| How often during the past 4 weeks did you have trouble falling asleep?       | 1               | 2                | 3                      | 4                | 5                    | 6                |

#### Sleep disturbance Maintenance (2-items)

|                                                                                                                                                 | All of the time | Most of the time | A good bit of the time | Some of the time | A little of the time | None of the time |
|-------------------------------------------------------------------------------------------------------------------------------------------------|-----------------|------------------|------------------------|------------------|----------------------|------------------|
| How often during the past 4 weeks did you feel that your sleep was not quiet (moving restlessly, feeling tense, speaking, etc, while sleeping)? | 1               | 2                | 3                      | 4                | 5                    | 6                |
| How often during the past 4 weeks did you awaken during your sleep time and have trouble falling asleep again?                                  | 1               | 2                | 3                      | 4                | 5                    | 6                |

#### Snoring (1-item)

|                                                                    | All of the time | Most of the time | A good bit of the time | Some of the time | A little of the time | None of the time |
|--------------------------------------------------------------------|-----------------|------------------|------------------------|------------------|----------------------|------------------|
| How often during the past 4 weeks did you snore during your sleep? | 1               | 2                | 3                      | 4                | 5                    | 6                |

**Awakening short of breath or with headache (1-item)**

|                                                                                      | All of the time | Most of the time | A good bit of the time | Some of the time | A little of the time | None of the time |
|--------------------------------------------------------------------------------------|-----------------|------------------|------------------------|------------------|----------------------|------------------|
| How often during the past 4 weeks did you awaken short of breath or with a headache? | 1               | 2                | 3                      | 4                | 5                    | 6                |

**Sleep inadequacy (2-items)**

|                                                                                                       | All of the time | Most of the time | A good bit of the time | Some of the time | A little of the time | None of the time |
|-------------------------------------------------------------------------------------------------------|-----------------|------------------|------------------------|------------------|----------------------|------------------|
| How often during the past 4 weeks did you get enough sleep to feel rested upon waking in the morning? | 1               | 2                | 3                      | 4                | 5                    | 6                |
| How often during the past 4 weeks did you get the amount of sleep you needed?                         | 1               | 2                | 3                      | 4                | 5                    | 6                |

**Daytime somnolence (3-items)**

|                                                                                           | All of the time | Most of the time | A good bit of the time | Some of the time | A little of the time | None of the time |
|-------------------------------------------------------------------------------------------|-----------------|------------------|------------------------|------------------|----------------------|------------------|
| How often during the past 4 weeks did you feel drowsy or sleepy during the day?           | 1               | 2                | 3                      | 4                | 5                    | 6                |
| How often during the past 4 weeks did you have trouble staying awake during the day?      | 1               | 2                | 3                      | 4                | 5                    | 6                |
| How often during the past 4 weeks did you take naps (5 minutes or longer) during the day? | 1               | 2                | 3                      | 4                | 5                    | 6                |
